# Supplementary material
Source: publisher site journal article supplement (https://www.spandidos-publications.com/6985/downloadSupplementary)
Supplement: Supplementary file 1 [file downloadSupplementary]

## Sheet: Table S1 DEGs list
	Table SI. List of differentially expressed genes.
list DEGs	logFC	logCPM	PValue	FDR	change
AGXT	8.14015	-0.376927	8.31523e-85	1.54181e-80	up
FABP9	6.44755	-4.44907	8.36047e-28	7.75099e-24	up
NLRP7	5.30794	-0.604274	1.57584e-27	9.73976e-24	up
OSTN	5.80193	-3.94673	3.48583e-26	1.61586e-22	up
GUCA2A	5.43682	-4.49506	6.86478e-25	2.54574e-21	up
ZSCAN4	5.58862	-2.70871	2.31637e-23	7.15835e-20	up
USP41	4.66008	-1.55519	6.47359e-23	1.71476e-19	up
SUSD2	3.83288	5.99311	2.50472e-21	5.80531e-18	up
TNFSF15	3.51729	2.79066	3.40927e-18	7.02385e-15	up
CDKAL1	2.05565	4.50249	4.89627e-18	9.07867e-15	up
WDR87	4.00806	-2.0526	7.9669e-14	1.34293e-10	up
B3GAT2	2.44592	-0.469472	5.6549e-13	8.73776e-10	up
KCNT1	3.56319	-0.926506	7.0738e-12	1.00894e-08	up
PHF24	3.6376	0.170953	4.93432e-11	6.53515e-08	up
NT5C1A	3.58435	-4.07962	7.11209e-11	8.79149e-08	up
FRMPD4	3.62096	-2.78619	1.1974e-10	1.38764e-07	up
PRSS12	3.64801	2.4614	1.29437e-10	1.41177e-07	up
GDPD2	3.67423	0.298896	9.24142e-10	9.01866e-07	up													list
TMC1	2.88107	-1.88435	1.16264e-09	1.07788e-06	up
SLC4A1	3.38081	-3.24735	2.87916e-09	2.54216e-06	up
PXT1	2.49019	-3.27262	7.64333e-09	6.44194e-06	up
CD300LB	2.35972	0.321835	2.45143e-08	1.97628e-05	up
ANGPTL7	3.78024	-0.842781	3.00241e-08	2.31961e-05	up
CFTR	3.44552	0.260954	4.16787e-08	3.09123e-05	up
PRAC1	4.96808	-4.30225	5.33365e-08	3.80371e-05	up
SULT1B1	3.24452	0.71488	1.31599e-07	9.03746e-05	up
FGF7	2.22091	3.31929	2.25216e-07	0.000149141	up
ITGB6	2.67645	6.58602	3.16889e-07	0.000202612	up
KRT84	3.38535	-4.34353	3.6124e-07	0.00022327	up
LYVE1	2.37428	1.82486	5.31625e-07	0.000317981	up
C2CD6	2.32682	-0.720454	7.95681e-07	0.000461048	up
MAGEE2	2.60285	-2.82064	9.00515e-07	0.00050598	up
MMRN1	2.61873	2.6434	1.46871e-06	0.000778078	up
PCDH8	3.65658	-0.348915	2.51387e-06	0.00122664	up
SLC10A1	2.58859	-2.94199	4.39611e-06	0.00203782	up
SNPH	2.46189	4.11913	1.03789e-05	0.00469378	up
AMPH	2.31028	3.3714	1.39065e-05	0.00599659	up
OR5AK2	4.10718	-4.79052	1.53147e-05	0.00644532	up
NLRP10	3.24891	-4.14627	2.82404e-05	0.0111411	up
ACSL6	2.35151	1.6539	3.71572e-05	0.0143535	up
MGARP	2.18399	-1.06901	4.01041e-05	0.0150567	up
OR52E6	3.82239	-4.11474	4.62966e-05	0.0165083	up
ADAM33	2.06569	2.31751	5.05227e-05	0.0176753	up
PTH2R	2.39702	1.19119	5.44525e-05	0.0180296	up
KMO	2.14321	3.36012	5.81532e-05	0.0189171	up
C2orf88	2.02792	1.88138	6.32961e-05	0.0201177	up
AC115220.1	4.11113	-4.43317	6.40139e-05	0.0201177	up
ABCB5	2.51262	-0.94952	7.23916e-05	0.0216498	up
CHRNA4	3.59223	-1.39891	7.70833e-05	0.022687	up
TNXB	2.02596	4.14032	8.59845e-05	0.0241683	up
STAB2	2.08052	-0.298307	8.60267e-05	0.0241683	up
HBD	2.94063	-3.40317	9.71447e-05	0.0268844	up
ALX4	2.43447	1.59474	0.000127197	0.0332181	up
XPNPEP2	2.09289	0.295471	0.00013669	0.03425	up
IL33	2.13215	3.66213	0.000141135	0.0348923	up
PKHD1L1	2.21314	-0.807372	0.000144996	0.0353752	up
MAB21L3	2.34152	-1.68594	0.000156064	0.0370992	up
PRRG3	2.06631	0.191112	0.000170373	0.0390008	up
NPIPB13	2.18649	-1.58264	0.000176431	0.039895	up
IGF2BP3	2.75945	0.304867	0.000219071	0.0472327	up
